# Supplementary material
Source: PubMed Central journal article supplement (PMC3786574)
Supplement: NIHMS482692-supplement-Supplementary_Table_1.pdf [file NIHMS482692-supplement-Supplementary_Table_1.pdf]

Supplementary Table 1 | **IgSF T cell co-stimulatory and co-inhibitory receptors**

| Receptor subfamily | Molecule name             | Extracellular domains | T cell co-signalling   | Ligand/counter receptor |
|--------------------|---------------------------|-----------------------|------------------------|-------------------------|
| CD28               | CD28                      |                       | Stimulatory            | B71,B72,B7H2 (human)    |
|                    | ICOS (CD278)              |                       | Stimulatory            | B7H2                    |
|                    | CTLA4 (CD152)             |                       | Inhibitory             | B71,B72,B7H2 (human)    |
|                    | PD1 (CD279)               |                       | Inhibitory             | B7H1,B7DC               |
|                    | PD1H (VISTA)              |                       | Inhibitory             | Unknown                 |
|                    | BTLA (CD272)              |                       | Inhibitory             | HVEM, UL144             |
| B7                 | B71 (CD80)                |                       | Inhibitory             | B7H1,CD28,CTLA4         |
|                    | B7H1 (CD274,PDL1)         |                       | Inhibitory             | PD1, B71                |
| CD226              | CD226 (DNAM1)             |                       | Stimulatory            | CD112, CD155            |
|                    | CRTAM (CD355)             |                       | Stimulatory            | NECL2                   |
|                    | TIGIT (VSIG9,VSTM3)       |                       | Inhibitory             | CD112,CD113,CD155       |
|                    | CD96 (TACTILE)            |                       | Unclear                | CD111,CD155             |
| TIM                | TIM1 (HAVCR1,KIM1)        |                       | Stimulatory            | TIM4, TIM1,PS           |
|                    | TIM2 (TIMD2)              |                       | Inhibitory             | SEMA4A,H-ferritin       |
|                    | TIM3 (HAVCR2,KIM3)        |                       | Inhibitory             | Galectin9,PS            |
|                    | TIM4 (TIMD4)              |                       | Unclear                | TIM1,PS                 |
| CD2/SLAM           | CD2 (LFA2,OX34)           |                       | Stimulatory            | CD48                    |
|                    | SLAM (CD150,SLAMF1)       |                       | Stimulatory            | SLAM                    |
|                    | 2B4 (CD244,SLAMF4)        |                       | Stimulatory/inhibitory | CD48                    |
|                    | Ly108 (NTBA,CD352,SLAMF6) |                       | Stimulatory/inhibitory | Ly108,NTB-A (human)     |
|                    | CD84 (SLAMF5)             |                       | Stimulatory            | CD84                    |
|                    | Ly9 (CD229,SLAMF3)        |                       | Stimulatory            | Ly9                     |
|                    | CRACC (CD319,BLAME)       |                       | Stimulatory            | CRACC                   |
| BTN                | BTN1 (BTN1A1)             |                       | Unclear                | Unknown                 |
|                    | BTN2 (BTN2A1-3)           |                       | Unclear                | Unknown                 |
|                    | BTN3 (BTN3A1-3)           |                       | Unclear                | Unknown                 |
| LAIR               | LAIR1                     |                       | Inhibitory             | Collagens               |
| Orphan             | LAG3 (CD223)              |                       | Inhibitory             | MHCII and unknown       |
|                    | CD160 (BY55,NK28)         |                       | Inhibitory             | HVEM                    |

Legend: IgV IgC mucin-like GPI-linked; PS= phosphatidylserine
