# Supplementary material
Source: PubMed Central journal article supplement (PMC3786574)
Supplement: NIHMS482692-supplement-Supplementary_Table_2.pdf [file NIHMS482692-supplement-Supplementary_Table_2.pdf]

Supplementary Table 2 | **TNFRSF co-stimulatory and co-inhibitory molecules**

| Receptor subfamily    | Molecule name           | CRD types (order from cell membrane) | T cell co-signalling | Ligand/counter receptor       |
|-----------------------|-------------------------|--------------------------------------|----------------------|-------------------------------|
| Type-V (Divergent)    | 4-1BB (CD137)           |                                      | Stimulatory          | 4-1BBL                        |
|                       | OX40 (CD134)            |                                      | Stimulatory          | OX40L                         |
|                       | CD27 (TNFRSF7)          |                                      | Stimulatory          | CD70                          |
|                       | GITR (CD357)            |                                      | Stimulatory          | GITRL                         |
|                       | CD30 (TNFRSF8)          |                                      | Stimulatory          | CD30L                         |
| Type-L (Conventional) | TNFR1 (CD120a)          |                                      | Apoptosis/Survival   | TNF-β                         |
|                       | TNFR2 (CD120b)          |                                      | Apoptosis/Survival   | TNF-α                         |
|                       | HVEM (CD270)            |                                      | Stimulatory          | LIGHT,BTLA,CD160, LTα3,HSV1gD |
|                       | LTβR (TNFRSF3)          |                                      | Stimulatory          | LTα1β2, LIGHT                 |
|                       | DR3 (TNFRSF25)          |                                      | Stimulatory          | TL1A                          |
|                       | DcR3 (TNFRSF6B)         |                                      |                      | LIGHT,TL1A,FASL               |
|                       | FAS (CD95)              |                                      | Apoptosis            | FASL                          |
|                       | CD40 (TNFRSF5)          |                                      |                      | CD40L                         |
|                       | RANK (CD265)            |                                      | Unclear              | RANKL                         |
|                       | OPG (TNFRSF11B)         |                                      | Unclear              | RANKL                         |
|                       | TRAILR1-4 (TNFRSF10A-D) |                                      | Apoptosis            | TRAIL                         |
|                       | Type-S (EF-disulfide)   | TACI (CD267)                         |                      |                               |
| BAFFR (CD268)         |                         |                                      |                      | BAFF                          |
| BCMA (CD269)          |                         |                                      |                      | BAFF,APRIL                    |
| TWEAKR (CD266)        |                         |                                      | Unclear              | TWEAK                         |
| EDAR                  |                         |                                      | Unclear              | EDA-A1                        |
| XEDAR (TNFRSF27)      |                         |                                      | Unclear              | EDA-A2                        |
| Orphan                |                         | RELT (TNFRSF19L)                     |                      | Unclear                       |
|                       | DR6 (CD358)             |                                      | Inhibitory           | Unknown                       |
|                       | TROY (TNFRSF19)         |                                      | Unclear              | Unknown                       |
|                       | NGFR (CD271)            |                                      | Unclear              | Unknown                       |

CRD types: L1 L2 L3 L4 S Undetermined
